# Supplementary material
Source: PubMed Central journal article supplement (PMC7218419)
Supplement: advancesADV2020001510-suppl1.pdf [file advancesADV2020001510-suppl1.pdf]

## **Supplemental Materials**

### **Standard immunological and molecular biology reagents and procedures**

#### **Cell lines, Media, and Reagents**

HEK293T, K562, HPAC, THP-1, NCIH929, U266, RPMI8226 were purchased from ATCC (Manassas, VA) and maintained in media per the suppliers' recommendation. NK cells were cultured in SCG Medium (CellGenix GmbH, Freiburg, Germany) supplemented with 10% FBS, 1% penicillin/streptomycin, 2 mM GlutaMax, and 200 U/ml recombinant human IL-2 (Miltenyi Biotec). Clinical-grade Rim was diluted from a 100  $\mu$ M stock solution in ethanol for *in vitro* assays. For animal studies, Rim was further diluted into 0.9% saline. Research grade temsirolimus (Sigma, St. Louis, MO) was dissolved in ethanol for *in vitro* assays and in Injection Diluent (10% polyethylene glycol [PEG]-400 + 5% Tween-80, Sigma, St. Louis, MO) for animal studies.

#### **NK cell isolation**

Buffy coats from healthy donors were obtained from the Gulf Coast Regional Blood Center (Houston, TX). Peripheral blood mononuclear cells (PBMCs) were isolated by a density-gradient centrifugation technique (lymphoprep, Accurate Chemical & Scientific Corporation, Westbury, NY). CD56<sup>+</sup> NK cells were then enriched from PBMC using an NK isolation magnetic bead kit (Miltenyi Biotec, Inc., San Diego, CA) following manufacture's protocol.

#### **Retroviral and Plasmid Constructs**

iMC contains a TIR domain-deleted version of the TLR adaptor protein MyD88, CD40 cytoplasmic region, and two tandem ligand-binding FKBP domains.<sup>1</sup> iRC9 comprises tandem FRB and FKBP domain fused with truncated caspase-9.<sup>2</sup> Synthetic DNA (Integrated DNA Technology, San Diego, CA) encoding human IL-15 was cloned into SFG iRC9.iMC using the enzyme site SacII/PfIMI to generate pSFG-iRC9-IL15- $\Delta$ CD19-iMC. These SFG retroviral vectors also consist a truncated human CD19 as a marker. P2A and T2A sequences were used to separate encoding genes. A first generation CD123 CAR was generated with the 32716 scFV targeting CD123,<sup>3,4</sup> CD8 $\alpha$  stalk transmembrane domain, and the cytoplasmic CD3 $\zeta$  domain. iMC-BCMA. $\zeta$ -IL15 was generated by subcloning ScFV targeting BCMA (C12.A3.2L) and IL15 genes into pSFG-iMCCAR. $\zeta$  with XhoI/BamHI and SalI/MluI. All vectors contain CAR also had the QBEnd-10 minimal epitope (CD34 epitope)<sup>5</sup> as the marker. Tumor cells or NKs were transduced with pSFG-eGFPFirefly luciferase (eGFPFluc) or pSFG-orange Nano-lantern Renilla luciferase (ONLRluc)<sup>6</sup> for labelling.

#### **Flow methods for transduction efficiency**

Gene-modified NK cells were stained with anti-CD56-APCcy7 and anti-CD19-BV421 for iMC or iRC9 transgene expression. For CAR transduced cells, anti-CD34 QBEnd-10-PE (Abnova) was used to determine transduction efficiency.

#### **CD107a and intracellular staining**

CD107a degranulation and intracellular cytokine IFN-g, TNF- $\alpha$ , perforin, granzyme B productions were measured as reported.<sup>7</sup> Briefly, NK cells modified with iRC9 or iRC9.iMC vectors were cocultured with or without THP-1 tumor targets at 1:1 E/T ratio in the presence or absence of 1 nM Rimiducid for 4-hour incubation. Anti CD107a-PE antibody (eBioscience, San Diego, CA) was added during the first hour, followed by the secretion inhibitor monensin (2  $\mu$ M, BioLegend) and Brefeldin A (5  $\mu$ g/ml, BioLegend, San Diego, CA) treatment for the next 3 hrs. Cells were then washed, stained with surface antibodies anti-CD19-BV421, anti-CD56-APCcy7, anti-CD3-FITC (BioLegend). For intracellular staining, gene modified NK cells were co-cultured with or without THP-1 and rimiducid for overnight. Secretion inhibitors were added. Cells were harvested, washed, stained with surface antibodies anti-CD56-APC/Cy7 and anti-CD19-PE or anti-CD56 PE and anti-CD19 BV421 (BioLegend), fixed, permeabilized and stained intracellularly with anti-IFN-

$\gamma$ -APC, anti-TNF- $\alpha$ -APC (BD Biosciences), anti-Perforin-APC/Cy7 (BioLegend), or anti-Granzyme B-AF647 (BD Biosciences). For anti-T-bet PEcy7 and anti-PE Eomes staining, a transcription factor staining kit was used (eBioscience, San Diego, CA) after the NK cells were first stained with viability dye and surface anti-CD56 APC/Cy7 and anti-CD19 BV421.

### **Cytokine production**

Production of IFN- $\gamma$  by NKs modified with iRC9- $\Delta$ CD19, iRC9- $\Delta$ CD19-iMC, or iRC9-IL15- $\Delta$ CD19-iMC in the presence of various concentration Rimiducid was analyzed by ELISA (eBioscience). Ectopic IL-15 production was accessed by ELISA (BioLegend). In some experiments, cytokines production was analyzed using a 29-cytokine/chemokine multiplex array (Milliplex MAP; Millipore) system with a multiplex reader (Bio-Plex MAGPIX, Bio-rad).

1. Narayanan P, Lapteva N, Seethammagari M, Levitt JM, Slawin KM, Spencer DM. A composite MyD88/CD40 switch synergistically activates mouse and human dendritic cells for enhanced antitumor efficacy. *J Clin Invest*. 2011;121(4):1524-1534.
2. Duong MT, Collinson-Pautz MR, Morschl E, et al. Two-Dimensional Regulation of CAR-T Cell Therapy with Orthogonal Switches. *Mol Ther Oncolytics*. 2019;12:124-137.
3. Foster AE, Mahendravada A, Shinnars NP, et al. Regulated Expansion and Survival of Chimeric Antigen Receptor-Modified T Cells Using Small Molecule-Dependent Inducible MyD88/CD40. *Mol Ther*. 2017;25(9):2176-2188.
4. Mardiros A, Dos Santos C, McDonald T, et al. T cells expressing CD123-specific chimeric antigen receptors exhibit specific cytolytic effector functions and antitumor effects against human acute myeloid leukemia. *Blood*. 2013;122(18):3138-3148.
5. Philip B, Kokalaki E, Mekkaoui L, et al. A highly compact epitope-based marker/suicide gene for easier and safer T-cell therapy. *Blood*. 2014;124(8):1277-1287.
6. Takai A, Nakano M, Saito K, et al. Expanded palette of Nano-lanterns for real-time multicolor luminescence imaging. *Proc Natl Acad Sci U S A*. 2015;112(14):4352-4356.
7. Betts MR, Brenchley JM, Price DA, et al. Sensitive and viable identification of antigen-specific CD8+ T cells by a flow cytometric assay for degranulation. *J Immunol Methods*. 2003;281(1-2):65-78.

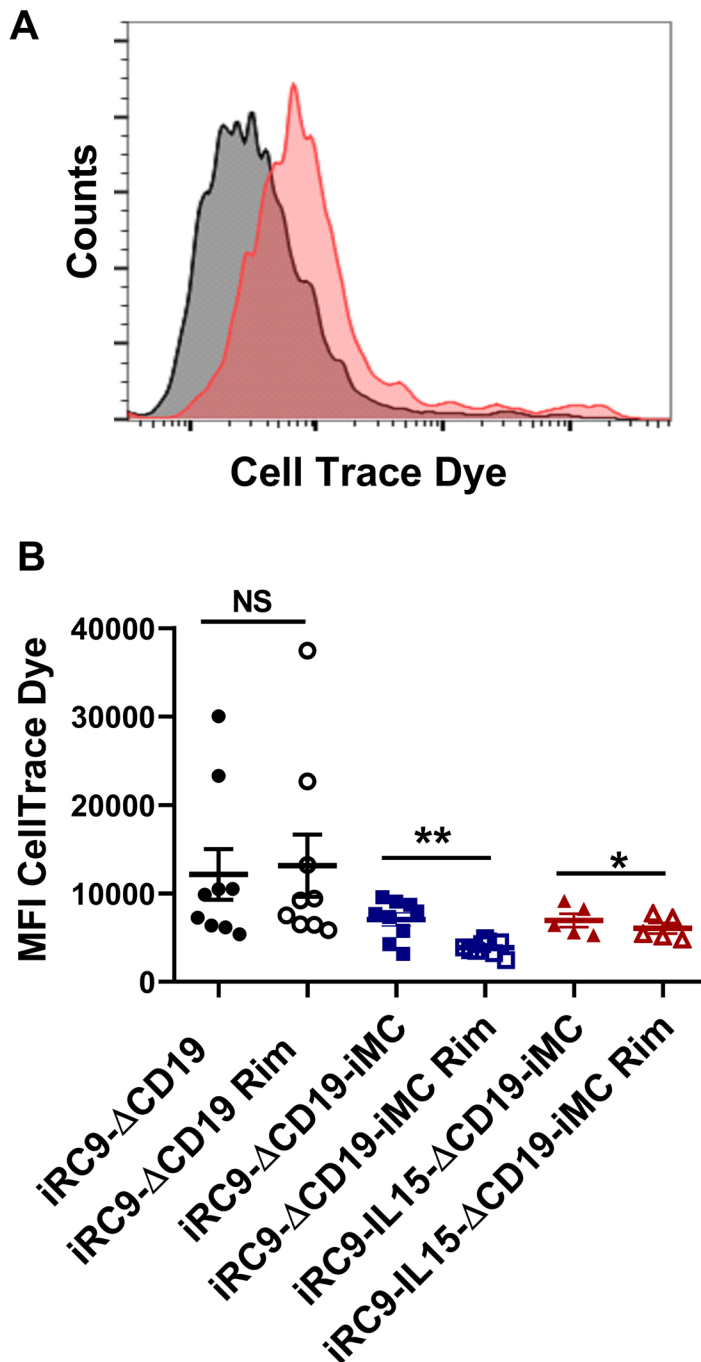

**Supplemental figure 1. iMC modified NK cells show enhanced proliferation upon Rim activation.** NK cells were labeled with CellTrace dye on the day of transduction. Proliferation was assessed 9 days later by dilution of labeling with each cell doubling. **(A)** Representative histograms demonstrating CellTrace dilution in iRC9-ΔCD19-iMC modified NK cell populations (gated on CD56+CD3-CD19+) with of 1 nM Rim (dark gray) or no Rim (red). **(B)** MFI of CellTrace dye in iRC9-ΔCD19, iRC9-ΔCD19-iMC, or iRC9-IL15-ΔCD19-iMC modified NKs with or without 1 nM Rim. Paired t test was used to compare the indicated groups. NS not significant; \* P < 0.05; \*\* P < 0.01.

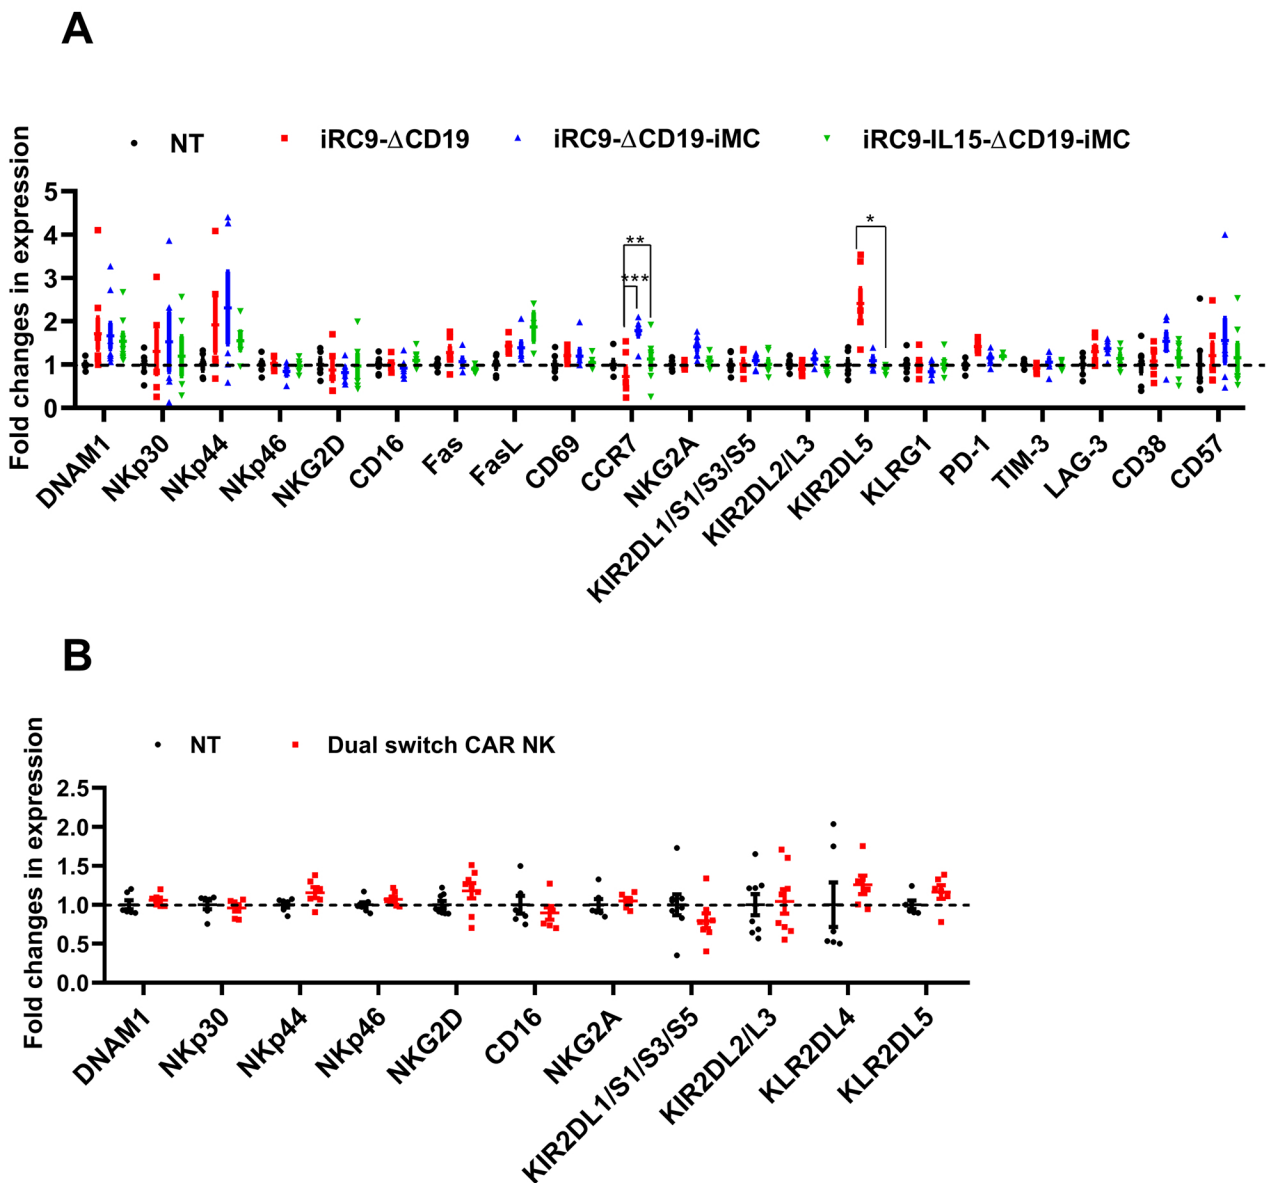

**Supplemental figure 2. Phenotype of iMC transduced NK cells. (A)** iRC9- $\Delta$ CD19, iRC9- $\Delta$ CD19-iMC, or iRC9-IL15- $\Delta$ CD19-iMC modified NK cell phenotypes based on the average expression of DNAM1, NKP30, NKP44, NKP46, NKG2D, CD16, Fas, FasL, CD69, CCR7, NKG2A, KIR2DL1/S1/S3/S5, KIR2DL2/L3, KIR2DL5, KLRG1, PD-1, TIM-3, LAG-3, CD38, and CD57 were characterized by multiparameter flow cytometry analysis. **(B)** Dual switch CAR NK (CD123. $\zeta$  + iRC9-IL15- $\Delta$ CD19-iMC) cell phenotype based on the average expression of DNAM1, NKP30, NKP44, NKP46, NKG2D, CD16, NKG2A, KIR2DL1/S1/S3/S5, KIR2DL2/L3, and KIR2DL4 was characterized by multiparameter flow cytometry analysis. MFI or the percentages of positive cells were normalized according the average value of NT NK cells. Paired t test was used to compare indicated groups. \*  $P < 0.05$ ; \*\*  $P < 0.01$ ; \*\*\*  $P < 0.001$ .

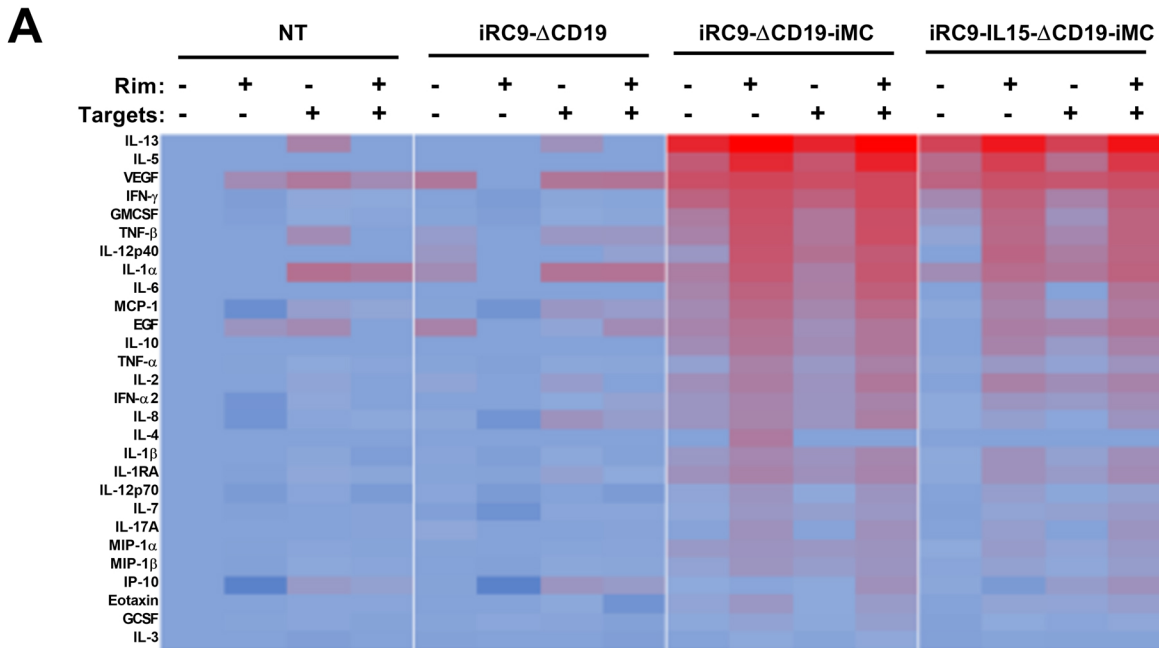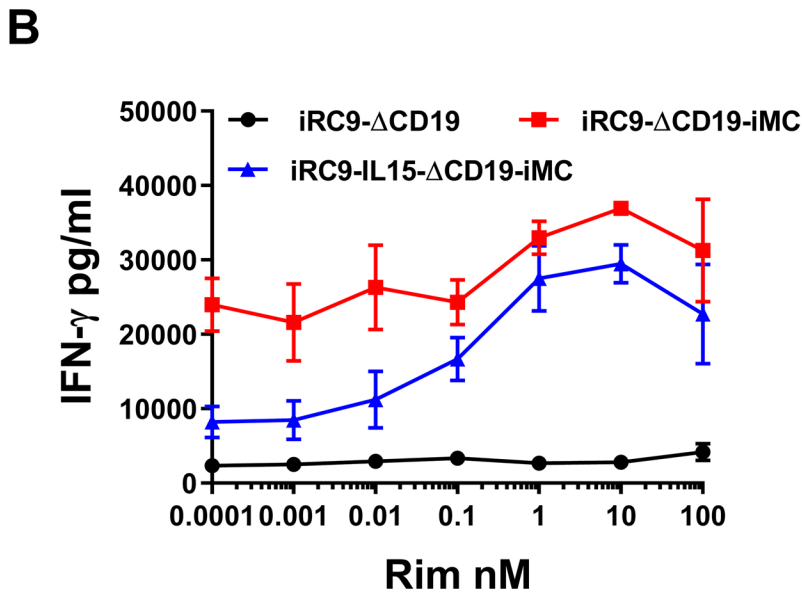

**Supplemental figure 3. iMC and iMC-IL15 enhance cytokine production. (A)** 28-plex cytokine multiplex analysis of supernatant from NT, iRC9- $\Delta$ CD19, iRC9- $\Delta$ CD19-iMC, or iRC9-IL15- $\Delta$ CD19-iMC modified NKs cocultured with or without THP-1 tumor targets at the E:T ratio of 3:1 in the absence or presence of 1 nM Rim for 48 hrs. Fold changes were in log scale compared with NT cells cultured without Rim or target cells. **(B)** IFN- $\gamma$  production in supernatants by iRC9- $\Delta$ CD19, iRC9- $\Delta$ CD19-iMC, or iRC9-IL15- $\Delta$ CD19-iMC modified NK cells when co-cultured with K562 cells at an E:T ratio 1:1 for 48 hr in the presence of increasing Rim concentrations (0 – 100 nM) (N = 3). 2-way ANOVA was used for comparisons. P < 0.0001.

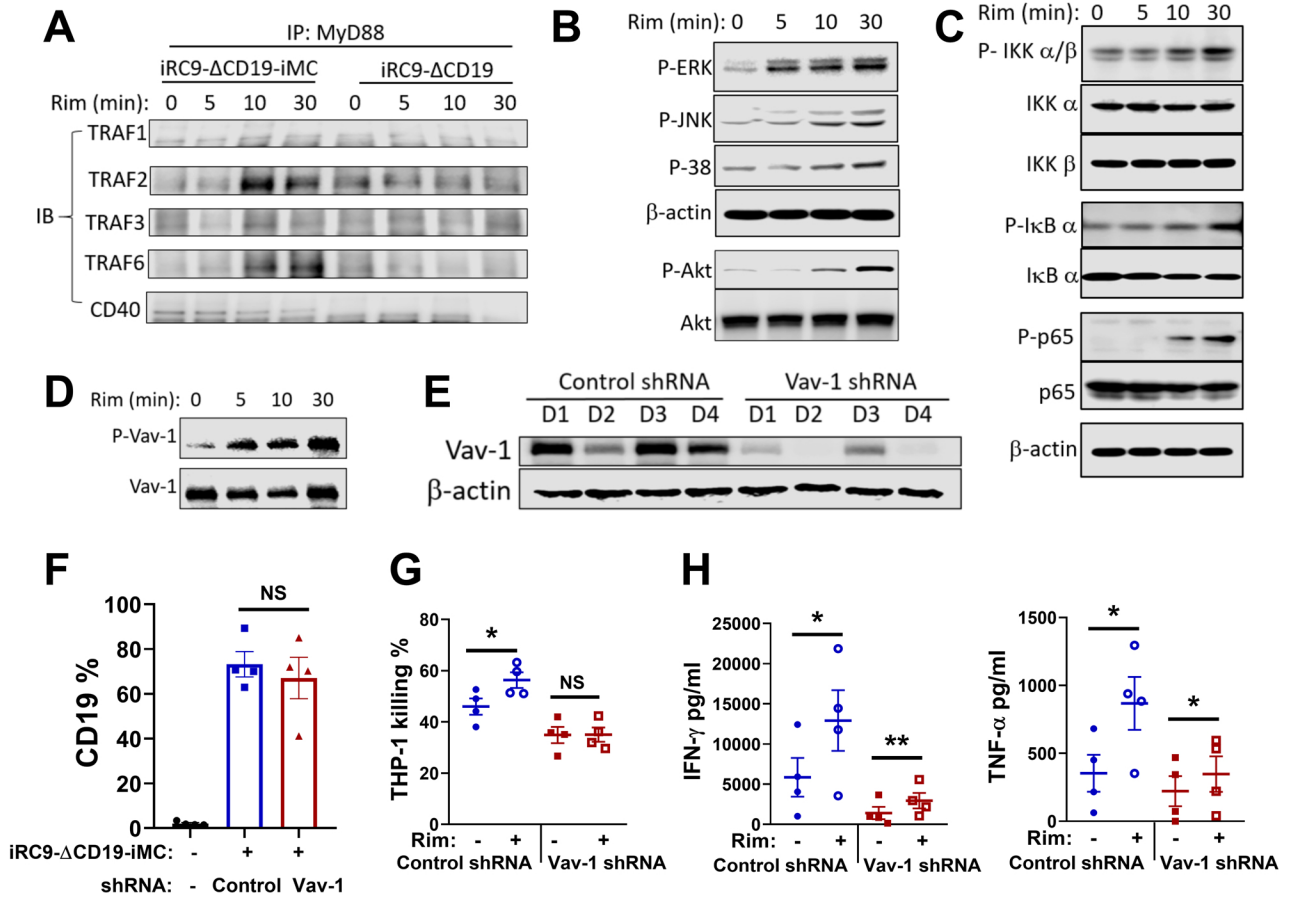

**I**

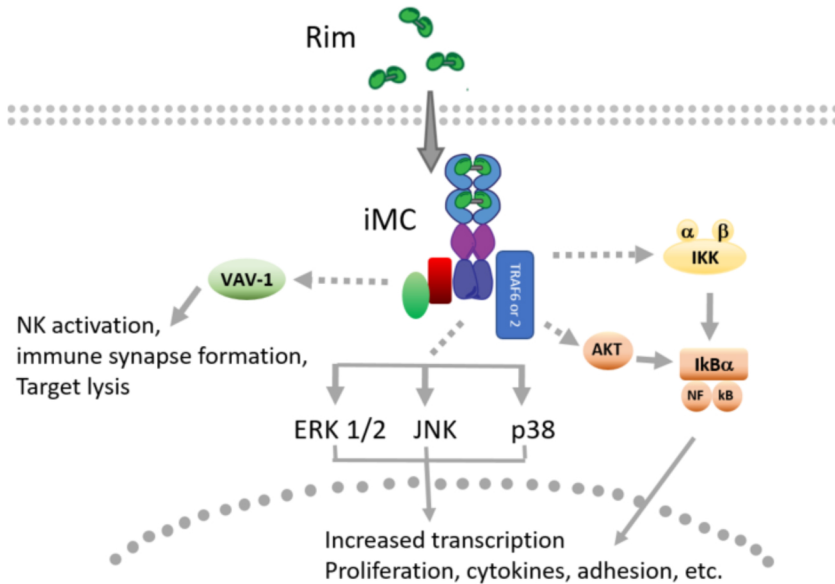

**Supplemental figure 4. Rim activation of iMC regulated multiple signaling pathways in NK cells.** (A) NK cells transduced with either iRC9- $\Delta$ CD19-iMC or iRC9- $\Delta$ CD19 were treated with 1 nM Rim for 0, 5, 10, 30 min. Cell lysates were subjected to immunoprecipitation with anti-MyD88 and immunoblotted with anti-TRAF1, TRAF2, TRAF3, TRAF6, and CD40. (B) iRC9- $\Delta$ CD19-iMC modified NK cells treated with 1 nM Rim for the indicated times were lysed and analyzed for phosphorylated (p) p-ERK, p-JNK, p-38,  $\beta$ -actin, p-AKT, and total AKT by Western immunoblotting. (C) The cell lysates were also subjected to immunoblotting for p-IKK  $\alpha/\beta$ , IKK  $\alpha$ , p-I $\kappa$ B  $\alpha$ , I $\kappa$ B  $\alpha$ , p-p65, p65 and (D) p-vav and total vav1. (E) 4 different donors of iRC9- $\Delta$ CD19-iMC modified NKs also transfected with control shRNA or shRNA targeting vav-1. Vav-1 knockdown was accessed via immunoblotting. (F) iRC9- $\Delta$ CD19-iMC transduction was measured by CD19 surface staining and flow analysis. (G) Gene modified NKs were co-cultured with THP-1 eGFPFluc targets overnight. NK cytotoxicity was determined by a luciferase activity assay (E:T 1:16). (H) IFN- $\gamma$  and TNF- $\alpha$  production were measured by ELISA (E:T 1:1). Paired t test was used to compare indicated groups. NS not significant; \* P < 0.05; \*\* P < 0.01. (I) The mechanisms of iMC induced NK cells activation - Rim induced dimerization of iMC molecules recruits adaptor proteins such as TRAF2 and TRAF6, followed by activation of kinases and downstream phosphorylation of MAPK pathways, phosphorylation of VAV-1, and activation of AKT, IKK, and NF- $\kappa$ B pathways, together resulting in non-transcriptional NK cell activation (immune synapse formation, target lysis) and transcriptional regulation and effects (NK cell activation, cytokine production, proliferation).

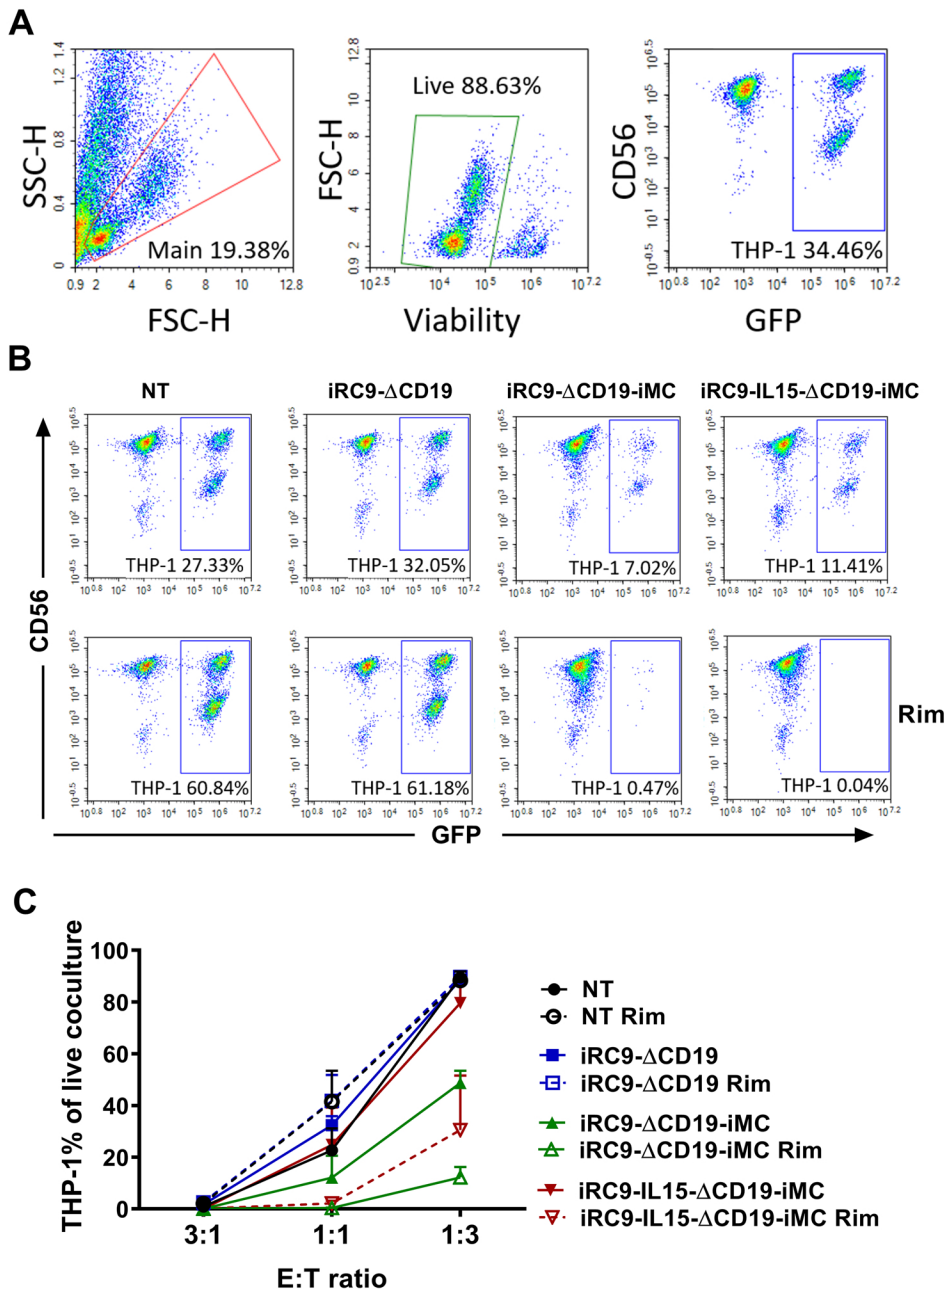

**Supplemental figure 5. iMC enhances NK cell cytotoxicity against THP-1 cells upon Rim activation.** Potency of NK cells modified with iRC9- $\Delta$ CD19-iMC or iRC9-IL15- $\Delta$ CD19-iMC compared with NT or iRC9- $\Delta$ CD19 modified NKs cells were tested in a 48-hr coculture assay with THP-1-eGFPFluc in the presence of 0 or 1 nM Rim. **(A)** THP-1-eGFPFluc cells were gated out as viability dye negative, GFP+ populations. **(B)** Representative flow plot showing NK cell and tumor cells at an E:T ratio of 1:1. **(C)** THP-1-eGFPFluc percentage in the co-cultures with 3 different donor's NK cells at E:T ratios of 3:1, 1:1, or 1:3 were plotted. 2-way ANOVA was used for comparisons.  $P < 0.0001$ .



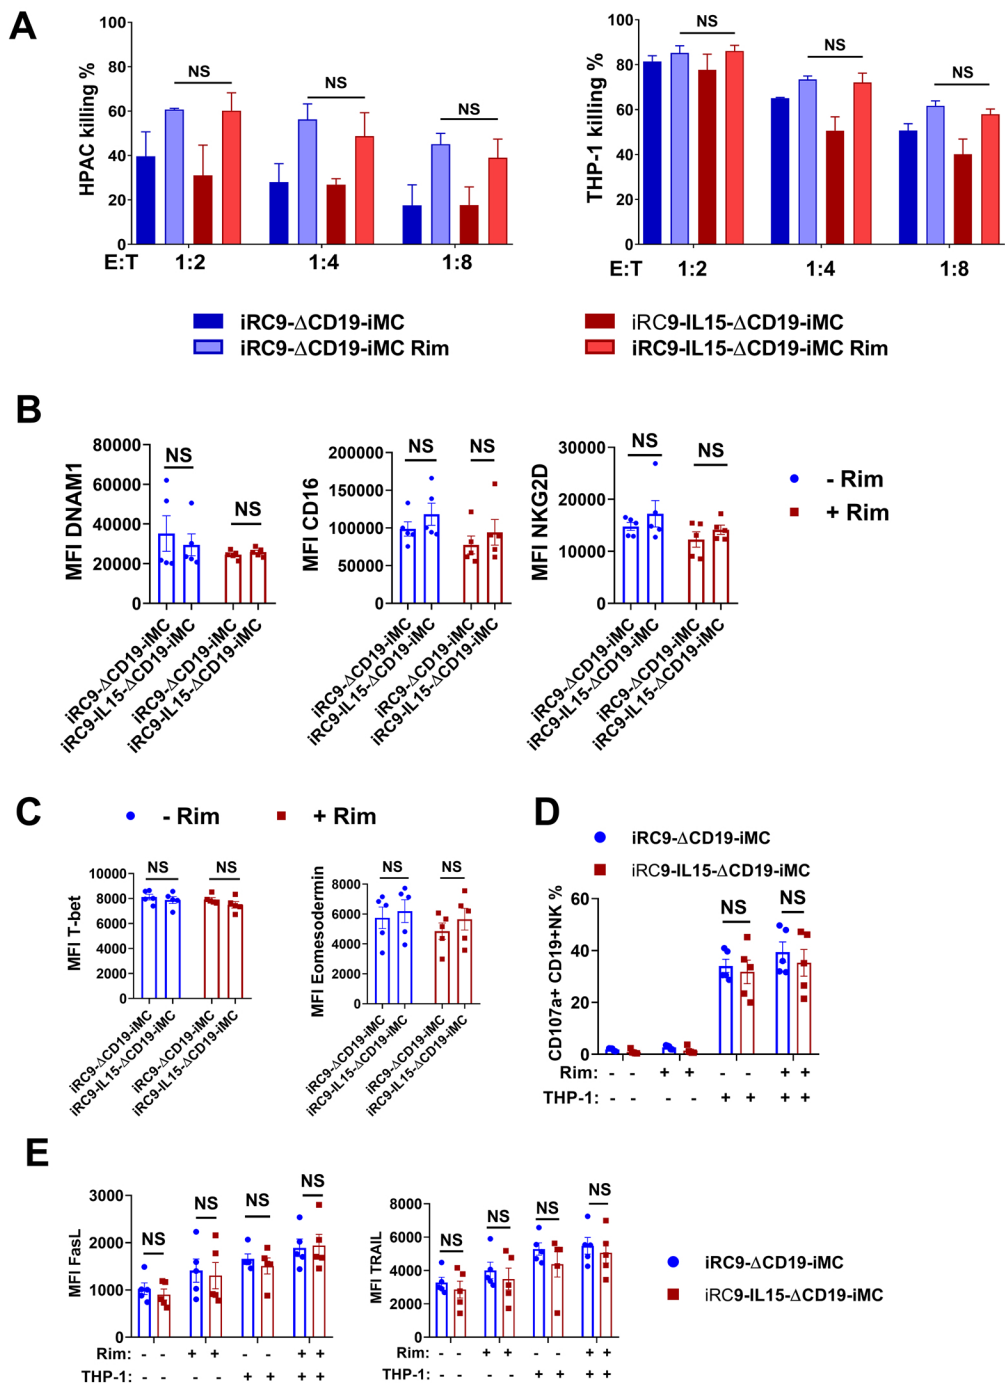

**Supplemental figure 6. Ectopic IL-15 expression does not lead to DS.IL15 NK cell exhaustion.** iRC9- $\Delta$ CD19-iMC or iRC9-IL15- $\Delta$ CD19-iMC gene modified NK cells were cultured in the presence or absence of 1nM Rim for 6 days. **(A)** Potency of NK cells was tested in 24-hr co-culture assays with HPAC-EGFPfluc or THP-1-EGFPfluc at decreasing effector-to-target (E:T) ratios. **(B)** NK activating receptors DNAM1, CD16, and NKG2D cell surface expression, and **(C)** nuclear T-bet and eomesodermin levels were measured by intracellular flow cytometry and indicated by mean fluorescence intensity of CD19+ NK cells. **(D-E)** iRC9- $\Delta$ CD19-iMC or iRC9-IL15- $\Delta$ CD19-iMC gene modified NK cells were incubated with / without THP-1 targets for 4 hrs (D) or overnight (E) in the presence or absence of 1 nM Rim. Percentages of cells expressing surface (D) CD107a and (E) cell surface FasL and TRAIL were measured by flow cytometry. Paired t tests were used to compare indicated groups. NS not significant.

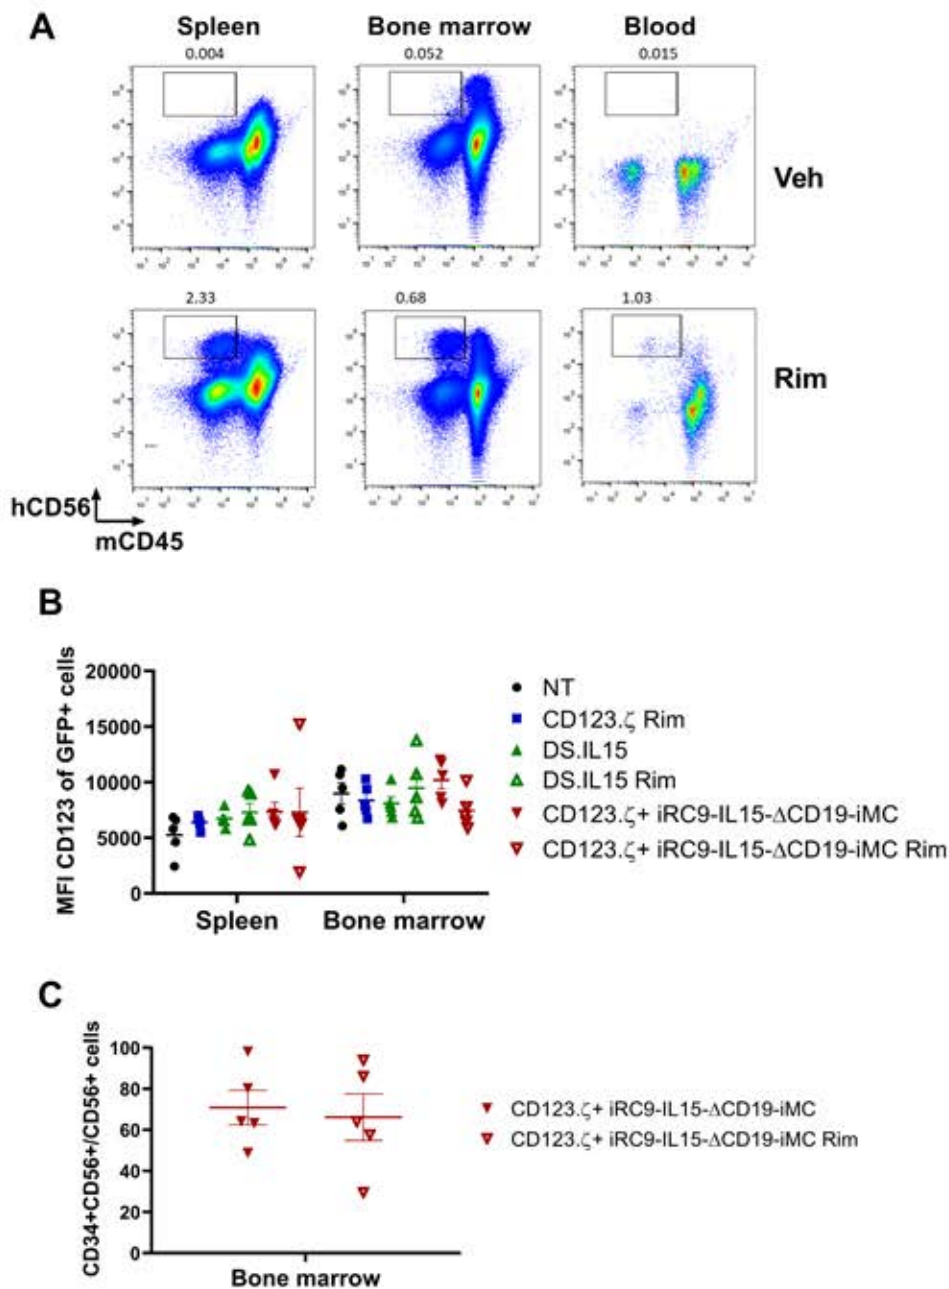

**Supplemental figure 7. In vivo persistence of NK cells modified with DS.IL15 and CD123.ζ (A)** Representative flow plots of human NK cells present in spleen, bone marrow and peripheral blood as hCD56<sup>+</sup>mCD45<sup>-</sup> populations. **(B)** CD123 surface expression of THP-1-eGFPFluc tumor cells (GFP<sup>+</sup> population) in spleen and bone marrow. Cells were isolated at day 35 post NK cell therapy, excepting the CD123.ζ + DS.IL15 Rim group that was at day 53. 2-way ANOVA was used for comparisons. P = 0.47. **(C)** CD123.ζ CAR expression was determined in bone marrow of iRC9-IL15-ΔCD19-iMC + CD123.ζ groups, indicated as CD34<sup>+</sup>CD56<sup>+</sup>/CD56<sup>+</sup>mCD45<sup>-</sup> population.
